# Supplementary material for: Palladium-containing perovskites: recoverable and reuseable catalysts for Suzuki couplingsElectronic supplementary information (ESI) available: experimental details. See http://www.rsc.org/suppdata/cc/b3/b308465e/
Source: Royal Society of Chemistry journal article supplement (doi:10.1039/b308465e), 2003-01-01
Supplement: b308465e.doc [file b308465e.doc]

Electronic Supplementary material for:

**Palladium-containing perovskites: recoverable and reuseable catalysts for Suzuki couplings**

Martin D. Smith, Chandrashekar Ramarao, Paul E. Brennan, Antonia F. Stepan and Steven V. Ley*

University Chemical Laboratory, Department of Chemistry, Lensfield Road, Cambridge, UK CB2 1EW.

Fax: +44 1223336442; Tel: +44 1223 336398; E-mail: svl1000@cam.ac.uk

**1. General Procedures**

**1.1. Coupling of an aryl iodide or bromide with a boronic acid**

A 20 mL tube was charged with the boronic acid (1.5 mmol), the aryl halide (1 mmol), LaFe0.57Co0.38Pd0.05O3 (1 mol%, 0.05 mol % Pd), K2CO3 (3 mmol) and water/IPA (1:1 v/v, 3 mL), and the mixture was stirred at 80˚C until LC indicated the reaction had proceeded to completion. The mixture was allowed to cool, diluted with diethyl ether (10 mL), and the supernatant liquid syringed off and passed through a 0.45 m syringe filter, eluting with diethyl ether (10 mL). The mixture was washed with water (5 mL) and the aqueous layer back extracted with diethyl ether (10 mL). The combined organic layers were dried (MgSO4), filtered and concentrated *in vacuo* to give crude material that was purified by flash column chromatography.

**1.2. Coupling of an aryl bromide and a boronic acid in the presence of tetra-*N*-butyl ammonium bromide**

Procedure identical to that described in procedure 1.1, but in the presence of tetra-*N*-butyl ammonium bromide (1.1 eq).

**1.3. Coupling of an aryl chloride with a boronic acid**

A Smith Process Vial™ was charged with the boronic acid (1.5 mmol), the aryl chloride (1 mmol), LaFe0.57Co0.38Pd0.05O3 (1 mol%, 0.05 mol % Pd), K2CO3 (3 mmol) and water/IPA (1:1 v/v, 3 mL). The vial was sealed and heated under microwave irradiation in a Personal Chemistry Smith Synthesizer™ at 135˚C for 1 h. The mixture was allowed to cool, diluted with diethyl ether (10 mL), and the supernatant liquid syringed off and passed through a 0.45 m syringe filter, eluting with diethyl ether (10 mL). The mixture was washed with water (5 mL) and the aqueous layer back extracted with diethyl ether (10 mL). The combined organic layers were dried (MgSO4), filtered and concentrated *in vacuo* to give crude material that was purified by flash column chromatography.

**1.4. Procedure for recycling experiments**

The reaction was prepared according to procedure 1.1. When the reaction was deemed to be complete, the reaction mixture was cooled to room temperature, diluted with acetone (to redissolve the crystalline product) and the supernatant liquid carefully syringed off and filtered through a 0.45 m syringe filter, eluting with diethyl ether. The solid LaFe0.57Co0.38Pd0.05O3 that remained in the reaction vessel was washed with diethyl ether, dried and reused in subsequent reactions.

**2. NMR spectroscopy**

Nuclear magnetic resonance (NMR) spectra were recorded on a Bruker DPX 400 (1H: 400 MHz and 13C: 100.6 MHz) spectrometer or AMX 600 (1H: 600 MHz and 13C: 150 MHz) spectrometer in the deuterated solvent stated. All chemical shifts () are quoted in ppm and coupling constants (J) in Hz. Residual signals from the solvents were used as an internal reference.

**3. Selected Data**

**(*E*)-1-(4-Methoxyphenyl)-2-phenylethene[[1]](#endnote-2)**

H (CDCl3): 7.66-7.47 (4 H, m), 7.37 (2H, t, J = 7.3), 7.26 (1H, t, J = 7.0), 7.09 (1H, d, J = 8.5), 7.01 (1H, d, J = 16.3), 6.93 (2 H, d, J = 8.5), 3.85 (3 H, s)

C (CDCl3): 159.4, 137.7, 130.2, 128.7, 128.3, 129.2, 126.7, 126.3, 114.2, 55.3.

**4-Methoxy-biphenyl[[2]](#endnote-3)**

H (CDCl3): 7.59-7.55 (4 H, m), 7.45 (2H, t, J = 7.5), 7.33 (1H, t, J = 7.4), 7.01 (2H, d, J = 8.8), 3.87 (3 H, s)

C (CDCl3): 159.2, 140.9, 133.8, 128.7, 128.2, 126.8, 126.7, 114.2, 55.3.

**1-Benzenesulfonyl-3-(4-methoxy-phenyl)-1*H*-indole**

H (CDCl3): 8.07 (1H, d, J = 8.3), 7.92 (2H, d, J = 7.5), 7.75 (1H, d, J = 7.9), 7.64 (1H, s), 7.55-7.52 (3H, m), 7.44 (2H, t, J = 8.0), 7.01 (2H, d, J = 8.7)

C (CDCl3): 159.2, 138.3, 135.6, 133.8, 129.6, 129.3, 129.1, 126.8, 125.4, 124.9, 123.9, 123.6, 122.3, 120.4, 114.4, 113.8, 55.4

**4-Methyl-biphenyl****[[3]](#endnote-4)**

H (CDCl3): 7.60 (2H, d, J = 7.4), 7.51 (2H, d, J = 8.0), 7.44 (2H, t, J = 7.4), 7.34 (1H, t, J = 7.4), 2.41 (3H, s)

C (CDCl3): 141.2, 138.4, 137.0, 129.5, 128.7, 127.0, 127.0, 126.9, 21.1

**4-Fluoro-biphenyl3**

H (CDCl3): 7.59-7.55 (4H, m), 7.46 (2H, t, J = 7.3), 7.37 (1H, t, J = 7.3), 7.15 (2H, t, J = 8.7)

C (CDCl3): 162.5 (s, 1JC, F = 244.7), 140.3, 137.4, 128.8, 128.7 (d, 3JC,F = 8.0), 127.0, 115.6 (d, 2JC,F = 21.2)

**4-Trifluoromethylbiphenyl[[4]](#endnote-5)**

H (CDCl3): 7.75-7.70 (4H, m), 7.63 (2H, d, J = 7.3), 7.51 (2H, t, J = 7.1), 7.44 (1H, t, J = 7.3)

C (CDCl3): 144.8, 139.8, 129.4(q, 2JC,F = 32.5), 129.0, 128.2, 127.4, 127.3, 125.7 (q, 3JC,F = 3.7), 124.3(q, 1JC,F = 271.9)

**4-Methoxy-4’-trifluoromethylbiphenyl**

H (CDCl3): 7.55 (2H, d, J = 8.6), 7.50 (2H, d, J = 8.6), 7.27 (2H, d, J = 8.1), 6.99 (2H, d, J = 8.6), 3.86 (3H, s)

C (CDCl3): 159.5, 148.2, 148.2, 139.6, 132.6, 132.4, 128.1, 127.9, 124.4, 121.8, 121.2, 119.3, 114.3, 55.3.

**3,4,5,4’-Tetramethoxybiphenyl**

H (CDCl3): 7.48 (2H, d, J = 8.7), 6.97 (2H, d, J = 8.7), 6.74 (1H, s), 3.92 (6H, s), 3.89 (3H, s), 3.85 (3H, s)

C (CDCl3): 159.2, 153.4, 137.3, 136.9, 133.9, 128.1, 114.2, 104.2, 60.9, 56.2, 55.4.

**2-Phenylthiophene[[5]](#endnote-6)**

H (CDCl3): 7.65 (2H, d, J = 7.3), 7.41 (2H, t, J = 7.4), 7.34 (1H, t, J = 3.5), 7.31-7.30 (2H, m), 7.11 (1H, dd, J =3.7, J= 5.0)

C (CDCl3): 144.5, 124.5, 128.9, 128.0, 127.5, 126.0, 124.8, 123.1.

**4-Nitrobiphenyl3**

H (CDCl3): 8.29 (2H, d, J = 8.8), 7.73 (2H, d, J = 8.8), 7.63 (2H, d, J = 7.2), 7.52-7.43 (3H, m)

C (CDCl3): 147.6, 147.1, 138.8, 129.2, 128.9, 127.8, 127.4, 124.1.

**3-Phenyl pyridine[[6]](#endnote-7)**

H (CDCl3):8.86 (1H, d, J = 1.8), 8.60 (1H, dd, J = 4.7, J = 1.2), 7.87 (1H, dt, J = 7.8, J = 1.9), 7.58 (2H, d, J = 7.3), 7.48 (2H, t, J = 7.2), 7.42-7.34 (2H, m).

C (CDCl3): 148.9, 148.8, 138.3, 137.0, 133.7, 129.5, 128.5, 127.6, 123.9.

1. A. K. Singh and S. Kanvah, *J. Chem. Soc., Perkin. Trans. 2*, 2001, 395. [↑](#endnote-ref-2)
2. S. Schneider and W. Bannwarth, *Helv. Chim. Acta.,* 2001, **84**, 735. [↑](#endnote-ref-3)
3. A. Zapf and M. Beller, *Chem. Eur. J.,* 2000, **6**, 1830. [↑](#endnote-ref-4)
4. X. Bei, H. W. Turner, W. H. Weinberg and A. S. Guram, *J. Org. Chem.,* 1999, **64**, 6797. [↑](#endnote-ref-5)
5. J. P. Wolfe, R. A. Singer, B. H. Yang and S. L. Buchwald, *J. Am. Chem. Soc.,* 1999, **121**, 9550 [↑](#endnote-ref-6)
6. T. Sakamoto, Y. Kondo, N. Murata and H. Yamanaka, *Tetrahedron*, **1993**, 49, 9713. [↑](#endnote-ref-7)
